# Supplementary material for: Factors associated with late recurrence after completion of 5-year adjuvant tamoxifen in estrogen receptor positive breast cancer
Source: BMC Cancer. 2016 Jul 7;16:430. doi: 10.1186/s12885-016-2423-x (PMC4937609; doi:10.1186/s12885-016-2423-x)
Supplement: Additional file 1: — This file includes raw-data of 583 patients’ characteristics and survival. (XLSX 40 kb) [file 12885_2016_2423_MOESM1_ESM.xlsx]

## Sheet: Sheet1
Recur free 1 Recur 2	Recur free 1 local 2 distant 3	Age	meno 1 pre 2 post 3 unk	t 2cm 1 2cm 2 >2cm	Ln neg0 pos1	HG unk 0 low 1 high 3	PR 1pos 2neg 3unk	her2 neg 1 pos2 unk3	Ki_67 10 neg1 pos2 unk3	DATEDIFF(Hormone completion -> free survival, month)
1	1	54	2	1	0	3	2	3	1	65
1	1	48	1	1	0	0	1	1	1	52
1	1	35	1	2	0	3	1	1	2	60
1	1	45	1	1	0	1	1	1	1	60
1	1	53	3	1	0	0	1	1	1	71
1	1	52	2	1	0	1	1	1	1	50
1	1	64	2	2	1	3	1	3	1	70
1	1	47	1	1	0	1	2	1	1	61
1	1	48	2	1	1	1	1	1	2	52
1	1	29	1	1	0	0	1	1	2	55
1	1	41	3	1	0	1	1	1	1	54
1	1	38	1	2	1	1	2	1	1	61
1	1	46	1	1	0	3	1	1	1	48
1	1	34	1	1	0	1	2	1	1	49
1	1	33	1	2	0	3	1	1	2	51
1	1	64	2	1	1	0	2	1	1	47
1	1	48	1	1	0	1	2	1	1	68
1	1	47	1	2	1	1	1	1	1	47
1	1	52	1	1	0	1	1	3	1	55
1	1	67	2	1	0	3	1	1	1	64
1	1	50	3	1	0	3	1	1	1	56
1	1	45	1	2	0	1	1	1	1	54
1	1	36	1	1	0	1	1	1	1	49
1	1	56	2	1	0	1	2	1	1	66
1	1	33	1	2	0	1	1	1	2	54
1	1	38	1	1	0	1	1	1	1	61
1	1	51	2	2	0	1	1	1	1	41
1	1	39	1	2	0	1	2	1	1	45
1	1	53	2	1	0	1	1	1	1	43
1	1	40	1	1	0	0	1	1	1	41
1	1	36	1	1	0	1	2	1	1	58
1	1	33	1	1	0	1	1	1	1	44
1	1	40	2	1	1	1	2	1	1	48
1	1	37	1	2	1	1	2	1	1	53
1	1	34	1	1	0	1	2	2	1	65
1	1	38	1	1	1	1	1	1	1	60
1	1	30	1	2	1	1	1	1	3	64
1	1	33	1	2	0	1	2	1	1	65
1	1	41	1	1	0	1	1	1	1	67
1	1	44	1	1	0	1	1	1	2	50
1	1	46	1	1	0	0	2	3	1	58
1	1	63	3	1	0	1	2	2	3	55
1	1	43	1	1	0	1	2	1	1	61
1	1	48	1	2	1	1	2	1	1	46
1	1	49	1	1	0	3	1	2	2	57
1	1	61	2	1	0	1	1	1	1	64
1	1	58	2	2	0	1	2	1	2	54
1	1	43	1	2	1	1	1	1	1	54
1	1	55	2	1	0	0	1	1	3	64
1	1	42	1	1	1	1	2	1	1	63
1	1	49	1	2	1	0	1	1	1	53
1	1	52	1	2	0	1	2	2	1	64
1	1	73	2	1	1	1	1	1	1	61
1	1	57	2	1	0	1	2	1	1	71
1	1	59	2	1	0	1	2	1	1	70
1	1	47	1	1	0	1	2	1	3	68
1	1	49	1	1	0	1	1	1	1	65
1	1	48	1	2	0	3	2	2	1	64
1	1	47	1	1	0	0	2	3	1	65
1	1	50	2	2	0	1	2	1	1	68
1	1	56	2	1	0	1	1	1	1	66
1	1	47	1	1	0	1	1	1	1	64
1	1	51	1	2	1	3	1	1	1	65
1	1	64	2	1	1	1	1	1	1	66
1	1	47	1	1	0	1	1	1	1	62
1	1	55	1	1	1	1	1	1	1	62
1	1	67	2	1	0	1	1	1	1	63
1	1	51	1	1	0	1	1	2	1	61
1	1	51	1	1	0	0	1	1	3	58
1	1	40	1	1	0	3	1	1	1	65
1	1	47	2	1	0	1	1	1	1	55
1	1	40	1	2	0	1	1	3	1	70
1	1	47	1	2	0	0	1	1	1	69
1	1	59	2	2	1	1	1	1	3	56
1	1	45	2	1	0	1	1	1	1	66
1	1	51	3	2	0	1	1	2	1	68
1	1	41	1	2	0	3	1	2	2	70
1	1	44	1	1	0	1	1	1	1	67
1	1	47	1	1	0	1	1	1	1	66
1	1	55	2	1	0	1	1	1	1	11
1	1	50	3	1	0	1	1	1	1	73
1	1	57	2	2	0	1	1	1	1	65
1	1	44	1	2	0	3	1	2	2	63
1	1	49	2	1	0	0	1	3	1	66
1	1	61	2	2	1	3	1	1	1	71
1	1	31	1	1	1	1	1	1	1	61
1	1	46	1	1	0	0	1	1	1	65
1	1	45	1	1	0	1	1	3	1	66
1	1	43	1	1	0	0	1	1	1	64
1	1	53	1	2	0	1	2	1	1	68
1	1	43	1	2	1	3	1	2	2	73
1	1	56	2	1	0	1	1	1	1	69
1	1	36	1	2	0	1	1	1	1	71
1	1	54	3	1	0	1	1	1	1	75
1	1	44	1	2	0	0	1	2	1	64
1	1	45	3	1	0	1	1	2	1	73
1	1	41	1	1	0	0	1	1	1	71
1	1	53	2	1	1	3	1	1	1	64
1	1	47	1	1	1	1	1	1	1	57
1	1	50	1	1	0	0	1	1	1	65
1	1	37	1	1	1	1	1	1	1	47
1	1	46	3	1	0	1	1	1	1	64
1	1	46	1	1	0	0	1	1	2	73
1	1	61	2	1	0	1	1	1	1	71
1	1	47	2	1	0	1	1	1	1	57
1	1	39	1	2	1	3	1	2	1	75
1	1	52	2	1	0	0	1	1	1	71
1	1	50	1	2	1	1	1	1	3	59
1	1	65	2	1	0	1	1	1	2	77
1	1	43	1	1	0	1	1	2	2	66
1	1	39	1	2	1	1	1	3	2	122
1	1	40	1	1	1	0	1	1	2	79
1	1	47	1	2	1	1	1	3	1	65
1	1	46	1	2	1	1	1	1	1	55
1	1	52	2	1	0	1	1	1	2	73
1	1	35	1	2	1	1	1	1	1	72
1	1	43	2	1	0	1	1	1	2	74
1	1	40	1	1	0	1	1	2	1	79
1	1	59	2	2	0	1	2	1	1	65
1	1	46	1	1	0	1	2	2	1	57
1	1	46	1	1	0	1	1	1	1	63
1	1	47	3	1	0	1	1	3	1	80
1	1	32	1	2	1	1	1	1	1	64
1	1	66	2	2	1	1	1	1	1	74
1	1	57	2	1	0	3	1	1	1	70
1	1	43	1	1	0	0	1	1	1	65
1	1	41	1	1	1	1	1	2	1	69
1	1	56	2	1	0	1	1	3	1	69
1	1	45	1	2	0	1	1	1	1	76
1	1	40	1	2	1	1	1	1	1	71
1	1	63	2	2	0	1	1	1	1	74
1	1	44	1	1	0	3	1	1	2	65
1	1	51	1	1	0	1	1	1	1	72
1	1	49	1	1	0	1	1	3	1	81
1	1	43	1	2	0	0	1	1	1	44
1	1	43	1	2	1	1	1	3	1	53
1	1	50	1	1	0	3	1	3	1	66
1	1	41	1	1	0	1	1	1	1	75
1	1	66	2	1	0	1	2	1	1	43
1	1	59	2	1	0	1	2	1	1	77
1	1	44	1	2	0	1	1	1	1	70
1	1	57	2	2	0	3	2	1	2	66
1	1	45	1	2	0	1	2	2	2	69
1	1	64	2	1	0	1	1	3	1	80
1	1	46	1	1	0	3	2	2	2	63
1	1	60	3	1	0	1	1	1	1	65
1	1	46	3	2	0	1	2	2	1	68
1	1	59	3	2	0	1	2	1	1	76
1	1	41	3	1	0	0	2	1	3	76
1	1	47	2	1	0	1	1	2	1	74
1	1	49	3	1	1	1	2	1	1	65
1	1	49	1	1	0	1	1	3	1	76
1	1	29	1	2	1	1	2	1	1	78
1	1	44	1	1	0	1	1	2	1	78
1	1	32	1	2	0	1	2	3	2	76
1	1	52	1	2	1	1	2	2	2	80
1	1	46	1	1	1	1	2	1	1	40
1	1	39	1	2	1	1	2	1	1	69
1	1	49	3	1	0	1	2	1	1	84
1	1	48	1	1	0	1	2	3	1	72
1	1	37	1	1	0	1	1	2	1	82
1	1	34	1	2	1	3	1	2	2	68
1	1	36	1	1	1	1	1	1	1	69
1	1	53	2	1	0	1	2	1	1	75
1	1	59	2	1	1	1	1	1	1	76
1	1	47	1	1	0	1	1	3	1	85
1	1	41	1	1	0	1	2	3	1	49
1	1	43	1	1	0	3	2	1	2	82
1	1	46	1	2	0	1	2	3	1	83
1	1	41	1	1	0	3	2	1	1	78
1	1	39	1	2	1	1	1	1	1	51
1	1	40	1	1	0	0	2	1	1	88
1	1	37	1	2	1	1	1	1	2	83
1	1	52	2	1	0	0	2	1	2	74
1	1	59	2	1	0	3	2	2	2	81
1	1	39	1	1	0	1	1	1	1	82
1	1	42	1	2	0	1	1	2	2	90
1	1	39	1	2	0	1	2	1	1	78
1	1	69	2	1	0	1	2	3	1	57
1	1	45	1	2	1	1	1	3	2	82
1	1	41	1	2	0	1	1	3	1	75
1	1	33	1	1	0	1	1	1	1	83
1	1	40	1	1	1	1	1	2	1	83
1	1	39	1	2	0	1	1	2	1	57
1	1	45	1	1	0	3	1	1	1	54
1	1	56	2	2	1	1	2	1	1	82
1	1	45	1	1	0	1	1	1	1	81
1	1	38	1	1	0	1	2	1	1	85
1	1	43	1	1	1	0	2	3	1	76
1	1	56	2	2	0	1	1	1	1	71
1	1	27	1	1	1	1	1	3	1	70
1	1	39	1	1	1	1	2	1	1	80
1	1	56	2	1	0	1	2	1	1	86
1	1	54	2	1	0	1	2	1	1	87
1	1	41	1	2	0	1	1	3	1	56
1	1	39	1	1	0	1	2	1	1	69
1	1	54	2	2	0	0	2	2	1	86
1	1	53	2	2	1	1	2	1	1	72
1	1	60	2	2	1	1	2	1	1	84
1	1	58	2	1	0	1	2	3	1	56
1	1	51	2	1	0	1	2	1	1	81
1	1	38	1	1	0	1	2	1	2	91
1	1	38	1	2	0	3	2	1	2	83
1	1	32	1	2	1	0	2	1	1	85
1	1	52	2	1	1	3	2	1	1	82
1	1	38	1	2	0	1	1	1	1	75
1	1	38	1	2	1	1	2	1	2	61
1	1	39	2	2	0	1	2	1	1	82
1	1	38	1	1	0	1	2	1	1	52
1	1	40	1	1	0	1	2	1	1	82
1	1	40	1	2	0	1	2	1	1	84
1	1	42	1	2	1	3	2	1	2	86
1	1	40	1	1	0	1	2	2	2	85
1	1	44	1	1	0	0	1	1	1	64
1	1	54	2	1	0	1	1	1	1	87
1	1	42	1	1	0	1	1	1	1	78
1	1	51	2	2	0	1	2	3	1	82
1	1	47	2	1	0	1	2	1	1	68
1	1	33	1	1	0	1	2	2	2	71
1	1	46	1	1	0	1	2	3	3	93
1	1	51	2	1	0	3	1	1	2	93
1	1	48	3	2	0	1	1	2	2	94
1	1	48	1	1	0	1	2	3	1	94
1	1	44	1	1	0	3	2	2	2	95
1	1	37	1	2	1	1	1	2	1	93
1	1	52	2	1	0	1	2	1	1	93
1	1	48	2	2	1	1	1	1	1	77
1	1	44	1	2	0	1	1	1	1	94
1	1	42	1	1	0	1	1	1	1	85
1	1	43	1	1	0	1	1	1	1	94
1	1	61	2	1	0	1	1	1	1	60
1	1	42	1	1	0	1	2	1	1	84
1	1	43	1	2	1	1	1	3	1	80
1	1	54	2	1	0	1	2	2	1	96
1	1	46	1	1	0	1	1	3	1	97
1	1	50	1	2	0	0	2	1	3	56
1	1	46	1	1	0	1	1	1	1	82
1	1	44	1	2	0	0	1	3	1	92
1	1	64	2	2	0	1	2	1	3	85
1	1	36	1	1	1	0	1	1	2	90
1	1	36	1	2	0	1	2	3	1	95
1	1	48	1	1	0	1	2	3	1	94
1	1	54	2	1	0	1	2	3	1	95
1	1	32	1	2	1	3	2	1	2	53
1	1	45	1	2	0	1	1	3	1	73
1	1	44	1	1	0	0	1	1	1	101
1	1	50	1	2	1	1	1	3	1	63
1	1	44	1	1	0	1	1	1	2	73
1	1	50	1	1	0	1	1	3	1	56
1	1	55	2	1	0	1	2	1	1	84
1	1	48	1	1	0	3	1	2	1	60
1	1	37	1	1	0	1	2	1	2	80
1	1	42	1	1	0	1	2	2	1	87
1	1	38	1	2	1	0	2	2	1	88
1	1	42	1	1	1	1	2	1	1	97
1	1	53	2	1	1	3	2	3	2	97
1	1	39	1	2	1	0	2	3	2	92
1	1	48	2	2	0	0	2	1	1	93
1	1	37	1	2	1	1	1	3	2	91
1	1	38	1	2	0	0	2	2	1	96
1	1	48	3	1	0	1	2	3	1	102
1	1	46	1	2	1	1	1	3	1	68
1	1	50	1	2	1	1	2	1	2	99
1	1	72	2	1	0	0	2	1	1	105
1	1	34	1	1	1	3	3	2	2	103
1	1	55	2	2	0	1	1	1	1	103
1	1	42	1	2	1	1	1	3	1	80
1	1	56	2	1	0	1	2	2	1	101
1	1	39	1	2	1	3	1	2	2	60
1	1	45	1	1	0	1	1	3	1	104
1	1	42	1	2	0	1	1	2	1	96
1	1	54	2	2	0	1	2	2	1	86
1	1	37	1	2	1	3	1	1	1	91
1	1	43	1	1	1	0	2	3	3	101
1	1	40	1	2	1	3	1	1	1	103
1	1	56	2	2	0	1	2	2	1	58
1	1	41	1	2	1	1	2	3	1	95
1	1	28	1	2	1	3	2	1	2	96
1	1	43	1	2	0	1	1	2	1	59
1	1	43	1	2	1	3	1	2	1	102
1	1	39	1	2	1	3	1	2	2	102
1	1	44	1	2	0	1	1	3	1	100
1	1	58	2	1	0	1	2	2	1	98
1	1	51	1	1	0	1	2	2	1	99
1	1	58	2	1	0	1	2	2	1	56
1	1	44	1	1	0	3	1	3	1	106
1	1	34	1	1	0	1	1	2	1	107
1	1	42	1	2	1	3	1	1	2	108
1	1	49	1	1	1	1	1	2	1	58
1	1	48	1	2	1	3	1	2	1	100
1	1	50	1	2	0	0	1	3	1	107
1	1	59	2	1	0	1	1	2	1	112
1	1	50	1	2	0	0	2	2	1	111
1	1	47	1	2	0	1	1	2	1	100
1	1	52	2	2	0	3	2	1	1	111
1	1	52	2	1	0	0	1	1	1	83
1	1	47	1	1	1	1	1	1	1	49
1	1	44	1	1	0	1	1	3	1	109
1	1	42	1	2	0	1	2	3	1	75
1	1	33	1	2	1	1	1	1	1	67
1	1	41	1	2	0	3	1	3	1	70
1	1	44	1	1	1	1	1	3	1	107
1	1	40	1	2	0	1	2	1	1	96
1	1	46	1	1	0	1	1	3	1	93
1	1	66	2	2	1	3	1	3	2	76
1	1	54	2	2	1	1	1	3	1	71
1	1	43	1	2	1	1	1	1	1	83
1	1	40	2	2	0	1	1	3	1	124
1	1	62	2	1	1	1	2	3	1	117
1	1	47	1	2	1	1	1	1	1	84
1	1	39	1	1	0	1	1	1	1	115
1	1	59	2	2	1	1	1	3	1	104
1	1	38	1	2	1	1	1	3	1	79
1	1	58	2	1	1	1	1	1	1	112
1	1	55	2	1	0	1	2	1	1	107
1	1	51	1	2	1	1	1	1	1	105
1	1	57	2	1	1	1	2	3	1	119
1	1	65	2	2	1	3	2	3	2	99
1	1	42	2	2	0	1	2	3	1	111
1	1	44	1	2	1	1	2	1	1	72
1	1	37	1	2	0	3	1	3	1	115
1	1	49	1	1	0	1	1	1	1	92
1	1	58	2	2	0	1	1	3	2	72
1	1	72	2	1	1	1	2	1	1	65
1	1	58	2	1	0	1	2	3	1	56
1	1	46	1	1	0	1	1	3	1	113
1	1	46	1	2	0	3	1	3	1	117
1	1	37	1	2	1	1	1	3	1	88
1	1	51	2	1	0	1	1	3	1	121
1	1	42	1	2	1	1	1	3	1	84
1	1	31	1	2	0	1	1	1	1	77
1	1	43	1	1	1	1	1	3	1	123
1	1	40	1	1	0	1	1	3	1	110
1	1	35	1	1	0	1	2	3	1	73
1	1	37	1	1	0	3	1	1	1	90
1	1	65	2	1	0	1	2	3	1	103
1	1	49	3	2	0	1	2	3	1	64
1	1	41	1	2	1	1	2	3	1	118
1	1	56	2	2	0	3	1	1	2	120
1	1	61	2	1	0	0	1	1	1	108
1	1	51	2	1	0	1	2	3	1	74
1	1	53	2	1	1	1	2	3	1	118
1	1	49	1	2	0	3	2	1	2	123
1	1	50	1	2	1	0	2	3	1	126
1	1	47	1	1	0	1	1	3	1	116
1	1	38	1	2	1	3	2	1	1	110
1	1	52	1	2	1	1	1	3	1	103
1	1	28	1	1	1	3	1	1	2	126
1	1	63	2	1	0	0	2	1	1	117
1	1	57	2	2	0	3	2	1	1	130
1	1	65	2	2	0	0	2	1	1	106
2	3	34	1	2	1	3	1	1	1	24
2	3	41	1	1	0	1	2	1	1	18
2	2	56	2	1	1	3	2	1	3	48
2	3	67	2	2	1	3	2	1	1	9
2	2	33	1	2	1	1	1	1	2	24
2	3	52	2	1	0	1	2	1	1	5
2	3	45	1	2	1	3	1	3	2	59
2	2	42	1	1	1	3	1	1	1	18
2	2	64	2	2	0	1	1	1	1	4
2	2	36	3	1	0	1	1	2	1	73
2	3	46	1	1	1	1	1	1	1	34
2	3	44	1	2	1	1	2	3	1	42
2	3	29	1	2	1	1	1	3	1	54
2	3	67	2	1	1	1	2	1	1	36
2	3	54	2	2	0	3	1	2	2	30
2	2	31	1	2	0	1	1	1	1	48
2	3	37	1	2	1	3	1	1	1	21
2	3	37	1	2	1	1	2	3	1	30
2	3	45	1	2	1	1	2	2	1	7
2	3	40	1	2	1	1	1	1	1	68
2	2	55	2	2	0	1	2	3	2	77
2	2	35	1	2	1	1	2	1	1	16
2	3	46	1	2	0	1	1	1	2	62
2	3	36	1	1	1	0	1	1	1	64
2	3	30	1	1	1	1	1	1	1	9
2	3	47	1	1	0	1	1	2	1	1
2	2	43	1	1	0	0	1	1	2	26
2	2	50	2	1	1	1	1	3	1	97
2	3	39	1	1	0	1	2	2	1	62
2	3	37	1	2	1	1	2	1	1	7
2	3	38	1	2	1	3	2	3	1	55
2	3	37	1	1	1	3	1	3	1	53
2	3	36	1	2	1	3	1	3	3	53
2	2	33	1	2	1	3	2	3	2	4
2	2	42	1	1	1	1	1	1	1	71
2	3	54	2	2	0	3	2	1	1	109
2	3	51	2	2	1	0	1	1	1	34
2	3	35	1	2	1	1	2	3	2	72
2	2	47	1	2	0	1	2	3	1	105
2	3	38	1	2	1	1	1	3	1	55
2	2	41	1	1	0	1	2	1	1	107
2	3	52	2	1	0	1	2	3	1	1
2	2	35	1	1	0	1	2	1	1	94
2	2	46	3	1	0	0	1	3	1	22
2	3	52	2	2	1	1	1	1	1	17
2	2	62	2	1	0	1	1	1	1	111
2	3	35	1	2	0	1	2	1	1	107
2	3	50	2	1	1	3	2	3	1	55
2	2	36	1	2	1	1	1	1	1	82
2	3	48	1	1	1	1	1	3	1	33
2	3	40	1	2	1	1	1	1	1	85
2	3	67	2	1	1	1	2	1	1	103
2	2	65	2	1	0	1	1	1	1	85
2	3	51	2	1	1	3	2	2	3	20
2	3	44	1	2	1	3	1	2	1	16
2	2	34	1	2	0	3	2	1	3	55
2	3	55	2	2	1	1	2	1	3	48
2	3	51	2	1	0	1	2	1	3	16
2	3	58	2	2	0	1	3	3	3	11
2	3	45	1	2	1	3	1	3	3	29
2	3	42	1	2	0	1	2	3	3	10
2	2	53	2	2	1	0	2	3	3	7
2	3	41	1	2	1	0	1	1	3	31
2	3	58	2	1	1	1	2	1	3	57
2	3	58	2	2	1	1	2	1	1	18
2	2	56	2	1	0	1	1	1	1	12
2	3	38	1	2	1	3	1	1	1	15
2	2	37	1	1	1	1	1	1	1	2
2	2	48	1	2	0	1	1	3	1	12
2	2	45	1	2	1	1	1	1	1	57
2	2	57	2	1	0	0	1	3	3	36
2	2	49	1	1	0	1	1	2	2	33
2	2	35	1	2	0	1	1	1	2	23
2	2	40	1	1	0	3	2	1	1	46
2	2	36	1	1	0	1	1	3	2	26
2	3	40	1	2	1	1	1	1	1	1
2	3	35	1	2	1	3	1	1	1	10
2	3	40	1	2	1	1	1	1	1	25
2	3	44	1	2	0	1	2	1	1	11
2	2	43	1	2	1	3	1	1	1	29
2	3	38	1	2	0	1	1	1	1	22
2	2	47	1	1	0	1	2	1	1	25
2	3	44	1	2	1	3	1	2	2	14
2	3	22	1	2	1	1	1	1	1	14
2	2	44	1	2	1	1	1	2	1	17
2	3	30	1	1	1	1	1	1	1	21
2	3	34	1	1	1	1	1	1	1	11
2	2	42	1	1	0	0	1	3	1	30
2	2	32	1	1	1	0	2	1	3	49
2	3	54	2	2	1	1	1	1	1	55
2	2	43	1	2	1	0	2	3	3	52
2	2	43	1	1	1	1	1	1	1	32
2	2	61	1	2	1	3	1	1	1	23
2	2	44	1	1	0	1	1	1	2	6
2	2	49	1	1	0	3	1	2	2	9
2	2	45	1	2	1	3	2	2	2	19
2	3	39	1	2	0	1	1	1	1	6
1	1	48	1	1	0	1	2	1	1	89
1	1	36	2	1	0	0	1	1	1	81
1	1	44	1	1	0	1	1	1	1	84
1	1	52	1	1	0	1	1	1	1	92
1	1	41	1	1	0	0	1	1	1	90
1	1	44	1	2	0	1	1	1	1	64
1	1	41	1	2	1	3	1	2	1	61
1	1	42	1	2	1	1	1	3	1	61
1	1	51	1	2	0	1	1	3	1	72
1	1	53	1	2	0	3	1	1	1	66
1	1	49	1	2	1	1	1	3	1	68
1	1	37	2	2	0	1	1	1	1	81
1	1	47	1	2	0	0	1	3	1	61
1	1	35	1	1	0	1	1	3	1	68
1	1	45	1	1	0	1	2	1	1	86
1	1	47	1	1	0	1	1	1	1	92
1	1	39	1	1	1	1	1	1	1	58
1	1	43	2	1	0	3	1	3	1	1
1	1	53	1	1	0	1	1	1	1	79
1	1	46	1	1	1	1	1	1	1	72
1	1	35	1	1	0	1	1	3	1	69
1	1	43	2	1	1	0	1	3	1	68
1	1	39	1	2	1	1	1	3	1	96
1	1	50	2	1	0	1	1	3	1	81
1	1	56	2	1	1	1	2	1	1	73
1	1	43	1	1	1	1	1	1	1	63
1	1	33	1	1	0	1	1	1	1	84
1	1	46	1	1	0	1	1	1	1	78
1	1	49	2	1	0	1	1	1	1	71
1	1	47	1	1	0	1	1	3	1	73
1	1	42	1	2	1	3	2	1	2	84
1	1	43	1	2	0	3	1	3	2	68
1	1	33	1	2	0	3	1	1	2	74
1	1	38	1	2	0	3	2	3	2	57
1	1	41	1	2	1	1	1	3	2	84
1	1	39	1	1	1	3	1	3	2	104
1	1	29	1	1	0	1	1	3	2	79
1	1	41	1	1	0	1	1	1	2	73
1	1	41	1	1	1	1	1	3	2	65
1	1	40	1	1	1	3	1	2	2	62
1	1	56	1	1	1	3	1	3	2	74
1	1	46	1	1	0	3	1	1	2	87
1	1	42	1	1	0	1	1	3	2	68
1	1	43	1	1	0	3	1	1	2	88
1	1	39	1	1	0	3	2	1	2	72
1	1	41	1	1	1	1	1	3	2	70
1	1	34	1	1	0	3	2	1	2	80
1	1	38	1	2	0	1	1	1	1	96
1	1	35	1	2	1	1	1	1	1	60
1	1	48	1	1	0	1	1	3	1	67
1	1	47	1	1	0	1	1	1	1	78
1	1	47	1	2	0	3	1	2	2	68
1	1	46	1	2	1	1	1	3	2	68
1	1	55	1	1	0	1	1	2	2	2
1	1	44	1	1	0	3	1	1	2	82
1	1	59	2	1	0	3	2	3	2	73
1	1	41	1	2	1	1	1	2	2	72
1	1	41	1	2	0	3	2	2	2	61
1	1	48	1	1	0	3	1	2	2	69
1	1	47	1	1	1	1	1	3	1	77
1	1	28	1	2	0	1	1	1	1	79
1	1	44	1	2	1	1	1	3	1	80
1	1	40	1	2	1	1	1	1	1	70
1	1	40	1	2	0	1	2	1	1	68
1	1	46	1	2	1	1	1	1	1	69
1	1	38	1	2	1	1	1	3	1	73
1	1	64	2	1	0	1	1	3	1	63
1	1	51	1	1	0	0	1	3	1	79
1	1	51	2	1	0	3	1	3	1	70
1	1	41	1	1	0	1	1	3	1	99
1	1	44	1	1	0	0	1	1	1	87
1	1	45	1	1	0	1	1	1	1	83
1	1	40	1	1	0	1	1	1	1	74
1	1	42	1	1	0	1	1	3	1	69
1	1	41	1	1	0	1	1	1	1	82
1	1	36	1	1	0	1	2	1	1	71
1	1	44	1	1	0	1	2	3	1	78
1	1	50	1	1	0	1	1	3	1	64
1	1	35	1	1	0	1	1	1	2	66
1	1	39	1	1	1	3	1	2	2	61
1	1	38	1	1	1	3	1	3	2	66
1	1	40	1	1	1	3	1	1	2	66
1	1	39	1	1	0	3	1	3	2	83
1	1	45	1	2	1	1	1	3	3	68
1	1	40	1	1	0	0	2	3	3	79
1	1	44	1	1	0	0	1	3	3	67
1	1	45	1	1	0	0	1	3	3	85
1	1	42	1	1	1	3	1	1	3	70
1	1	35	1	1	0	3	2	3	3	66
1	1	33	1	2	0	1	2	3	3	79
1	1	44	1	1	1	1	1	1	3	0.1
1	1	40	1	1	1	1	2	1	3	72
1	1	51	1	1	0	1	2	1	3	79
2	3	36	1	2	1	3	3	1	1	8
2	2	30	1	1	0	1	3	3	2	56
2	2	40	1	1	1	3	3	1	1	46
2	3	40	1	2	1	1	3	1	1	79
2	3	35	3	1	0	1	3	2	2	57
2	2	53	3	1	0	1	3	2	1	6
2	2	37	1	1	0	3	3	3	2	9
2	3	61	1	1	1	1	3	3	1	60
2	3	56	1	2	1	1	3	3	1	14
2	3	39	1	1	0	1	3	2	1	28
2	3	66	2	1	1	1	3	1	2	55
2	2	42	1	2	1	1	3	3	1	34
2	2	46	1	2	0	0	3	3	1	53
2	3	41	1	1	0	1	3	3	1	34
2	3	46	1	2	0	1	3	1	1	19
2	2	41	1	1	0	3	3	3	1	20
2	3	30	1	2	0	0	3	1	1	6
2	2	39	1	2	1	1	3	3	1	37
2	3	67	2	2	0	1	3	1	1	41
2	2	39	1	1	1	1	3	1	1	35
2	3	34	1	2	0	1	3	1	2	22
2	2	37	1	1	0	0	3	2	1	5
2	3	31	1	1	0	1	3	3	1	47
2	3	43	1	1	1	3	3	1	2	41
2	2	37	1	1	1	3	3	1	2	58
2	3	44	1	1	1	1	3	3	1	32
2	2	39	1	2	0	1	3	1	2	5
2	2	37	1	2	1	1	3	3	2	37
2	2	44	1	2	1	1	3	1	2	5
2	2	44	1	1	0	0	3	3	3	59
2	3	36	1	2	1	3	3	3	2	7
2	2	65	2	1	0	3	3	3	1	26
2	2	40	1	1	0	1	3	1	1	67
2	2	43	2	1	1	3	3	1	2	49
2	3	30	1	2	1	3	3	2	1	2
2	3	51	1	2	1	3	3	1	2	33
2	2	35	1	2	1	1	3	2	2	36
2	3	39	3	1	1	3	3	2	2	46
2	3	39	2	1	1	3	3	3	1	30
2	3	39	1	2	1	1	3	1	1	1
2	3	47	2	2	1	1	3	1	1	2
2	2	48	1	1	1	3	3	2	2	18
